# Supplementary material for: Benchmarking model-based design of experiment approaches with a pharmaceutical crystallisation emulator
Source: Research Square preprint supplement (doi:10.21203/rs.3.rs-7045911/v1), 2025-09-18
Supplement: Supplementary file 1 [file 67c74d19110dc35f1e30daf2.docx]

**Title:** Benchmarking model-based design of experiment approaches with a pharmaceutical crystallisation emulator

**Journal:** “Self-Driving Laboratories for Chemistry and Materials Science” collection in *npj Computational Materials*

**Authors:** Thomas Picklesa, Kakasaheb Nandiwaleb, Bhavik A. Mehtac, Sammy Sambud, Jonathan Mooresa, Alastair J. Florencea, e, Cameron J. Browna, e*

**Affiliations:** a Strathclyde Institute of Pharmacy and Biomedical Sciences, University of Strathclyde, Glasgow G4 0RE, UK, b Chemical Research and Development, Pfizer Worldwide Research and Development, Groton, Connecticut 06340, USA, c Siemens Industry Software Limited, Process Automation Software, 26-28 Hammersmith Grove, London, U.K, d UCB Biopharma SRL, Allée de la Recherche 60, B – 1070 Brussels, Belgium, e EPSRC MediForge Hub, CMAC, University of Strathclyde, Glasgow, G1 1RD, UK.

**Email:** *cameron.brown.100@strath.ac.uk

## 1. Introduction

Nothing to add to ESI.

## 2. Methods

### 2.1. Self-Driving Crystallisation Lab

A Latin hypercube sampling (LHS) plan was used with ordinal values for most of the input parameters so that the bounds would be selected rather than a continuous value within the range. This helps with parameter estimation in predicted high growth and high nucleation dominating areas. Parameters from the plan are listed in Table 1 along with ‘real terms’ values i.e., a parameter that can be controlled directly via the Scale-up CMC DataFactory™ for example seed SS is linked to seed temperature.

Table 1. LHS design of experiments plan for the 16 experiments.

| Exp Num | Exp Name | Mass lovastatin (g) | Mass acetone (g) | Volume acetone (mL) | Mass of water (g) | Volume water (mL) | Conc-init (g/kg solvent) | Cooling Rate (°C/min) | Seed Mass (%) | Seed Mass (g) | Seed Size | Seed SS | Seed Temp (°C) | Antisolvent Flow Rate (mL/min) | Mass of antisolvent (g) | Volume of antisolvent (mL) |
| --- | --- | --- | --- | --- | --- | --- | --- | --- | --- | --- | --- | --- | --- | --- | --- | --- |
| 1 | PICKL71 | 52.5 | 225 | 287 | 25 | 25 | 210 | 0 | 0 | 0 | small | 1.2 | 40 | 0 | 0 | 0 |
| 2 | PICKL77 | 52.5 | 225 | 287 | 25 | 25 | 210 | 0.25 | 1 | 0.525 | big | 1.22 | 40 | 6 | 250 | 251 |
| 3 | PICKL78 | 52.5 | 225 | 287 | 25 | 25 | 210 | 0.5 | 5 | 2.625 | small | 1.24 | 39 | 10 | 250 | 251 |
| 4 | PICKL86 | 52.5 | 225 | 287 | 25 | 25 | 210 | 0.25 | 5 | 2.625 | big | 1.26 | 39 | 3 | 250 | 251 |
| 5 | PICKL80 | 52.5 | 225 | 287 | 25 | 25 | 210 | 0.5 | 0 | 0 | small | 1.912251 | 27.5* | 6 | 250 | 251 |
| 6 | PICKL72 | 52.5 | 225 | 287 | 25 | 25 | 210 | 0 | 1 | 0.525 | big | 1.3 | 38 | 0 | 0 | 0 |
| 7 | PICKL87 | 52.5 | 225 | 287 | 25 | 25 | 210 | 0.25 | 1 | 0.525 | small | 1.32 | 37 | 3 | 250 | 251 |
| 8 | PICKL73 | 52.5 | 225 | 287 | 25 | 25 | 210 | 0 | 5 | 2.625 | big | 1.34 | 37 | 0 | 0 | 0 |
| 9 | PICKL83 | 52.5 | 225 | 287 | 25 | 25 | 210 | 0.5 | 0 | 0 | small | 1.447779 | 35* | 10 | 250 | 251 |
| 10 | PICKL74 | 52.5 | 225 | 287 | 25 | 25 | 210 | 0 | 1 | 0.525 | small | 1.38 | 36 | 0 | 0 | 0 |
| 11 | PICKL89 | 52.5 | 225 | 287 | 25 | 25 | 210 | 0.5 | 5 | 2.625 | small | 1.4 | 36 | 3 | 250 | 251 |
| 12 | PICKL85 | 52.5 | 225 | 287 | 25 | 25 | 210 | 0.25 | 0 | 0 | big | 1.94084 | 27.1* | 10 | 250 | 251 |
| 13 | PICKL75 | 52.5 | 225 | 287 | 25 | 25 | 210 | 0 | 5 | 2.625 | small | 1.44 | 35 | 0 | 0 | 0 |
| 14 | PICKL84 | 52.5 | 225 | 287 | 25 | 25 | 210 | 0.25 | 0 | 0 | big | 1.447779 | 35* | 6 | 250 | 251 |
| 15 | PICKL90 | 52.5 | 225 | 287 | 25 | 25 | 210 | 0.5 | 1 | 0.525 | small | 1.48 | 34 | 3 | 250 | 251 |
| 16 | PICKL76 | 52.5 | 225 | 287 | 25 | 25 | 210 | 0 | 1 | 0.525 | big | 1.5 | 34 | 0 | 0 | 0 |

**Unseeded therefore seed temperature was extracted from result (not the LHS planned temperature)*

### 2.2. Population Balance Model (gPROMS) & Simulation

Nothing to add to ESI.

### 2.3. Benchmark Function

Nothing to add to ESI.

### 2.4. Experimental Design & Optimisation

Nothing to add to ESI.

## 3. Results

### 3.1. Population Balance Model & Simulation


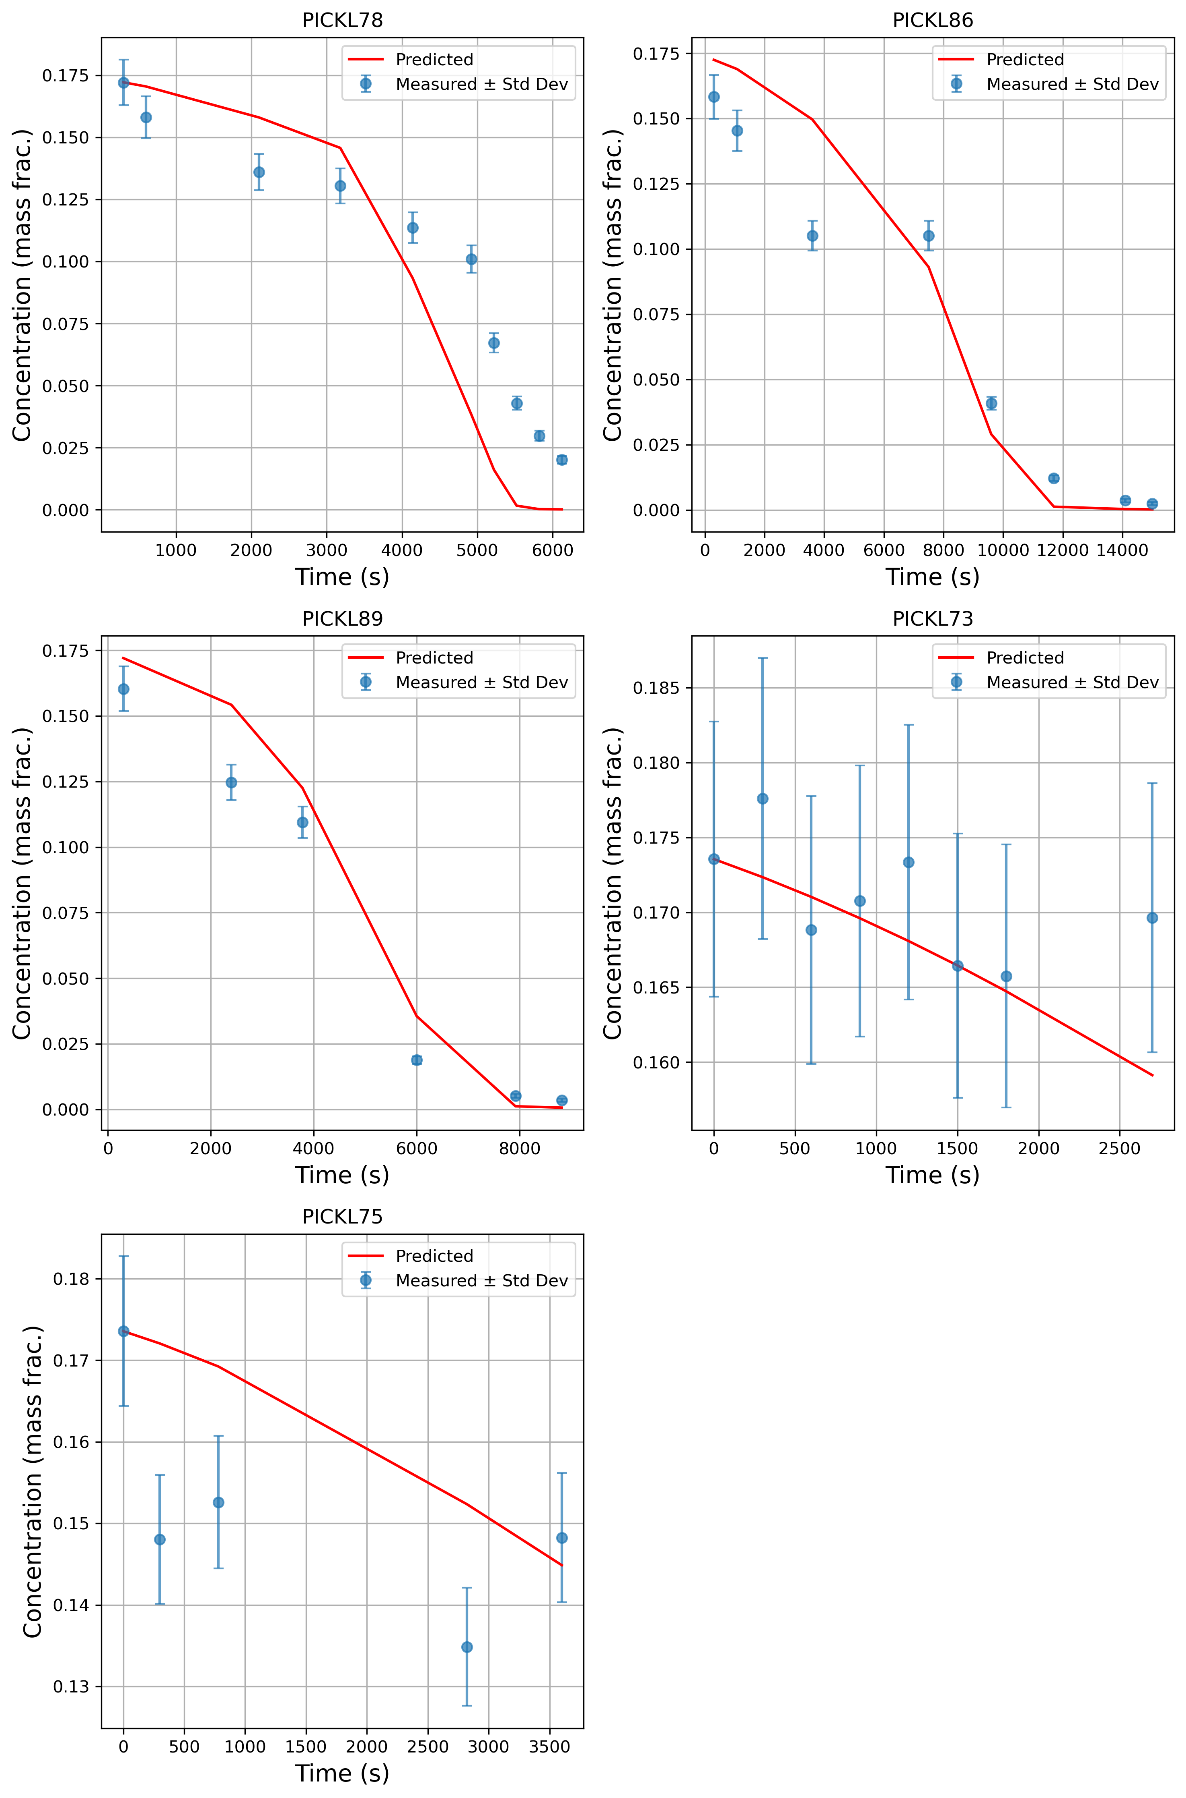


Figure 1. Measured and best fit predicted concentration trends for experiments with high seed loading to calibrate growth model parameters.


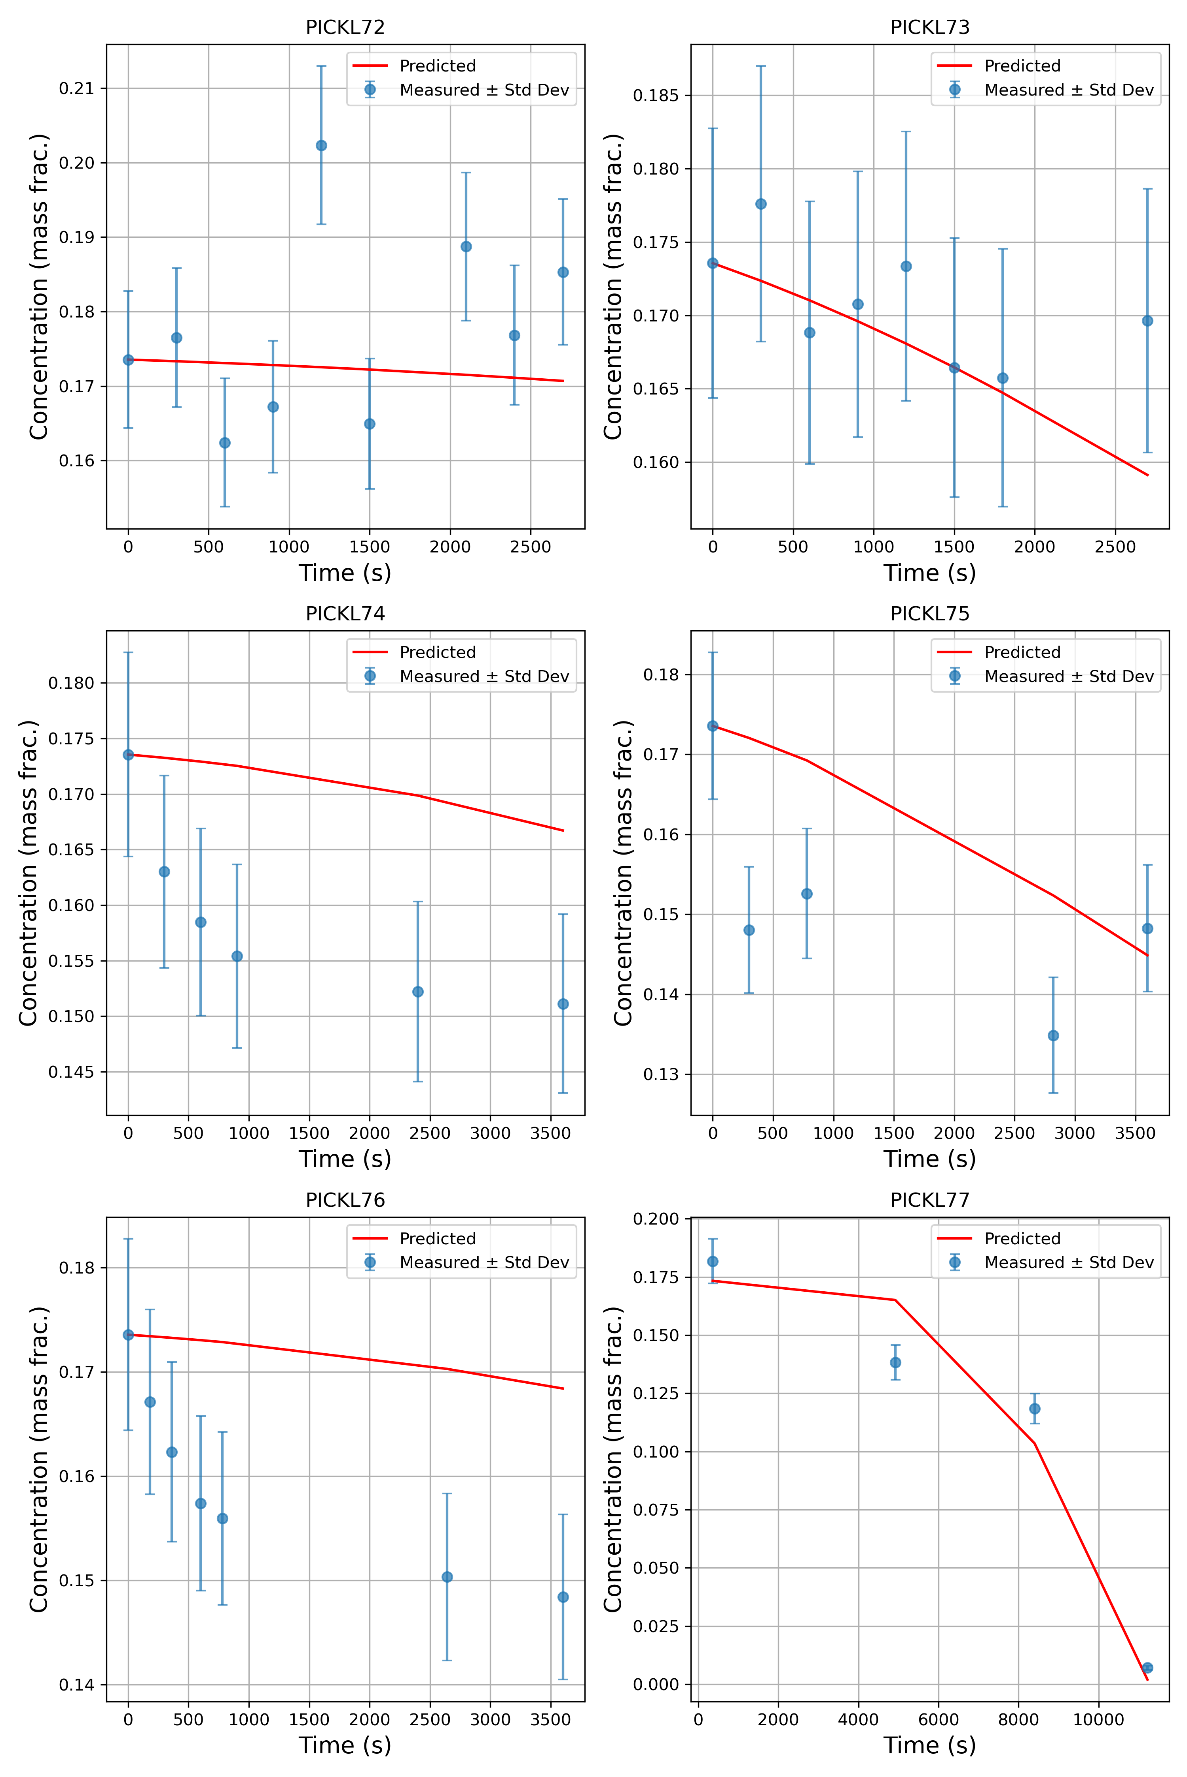


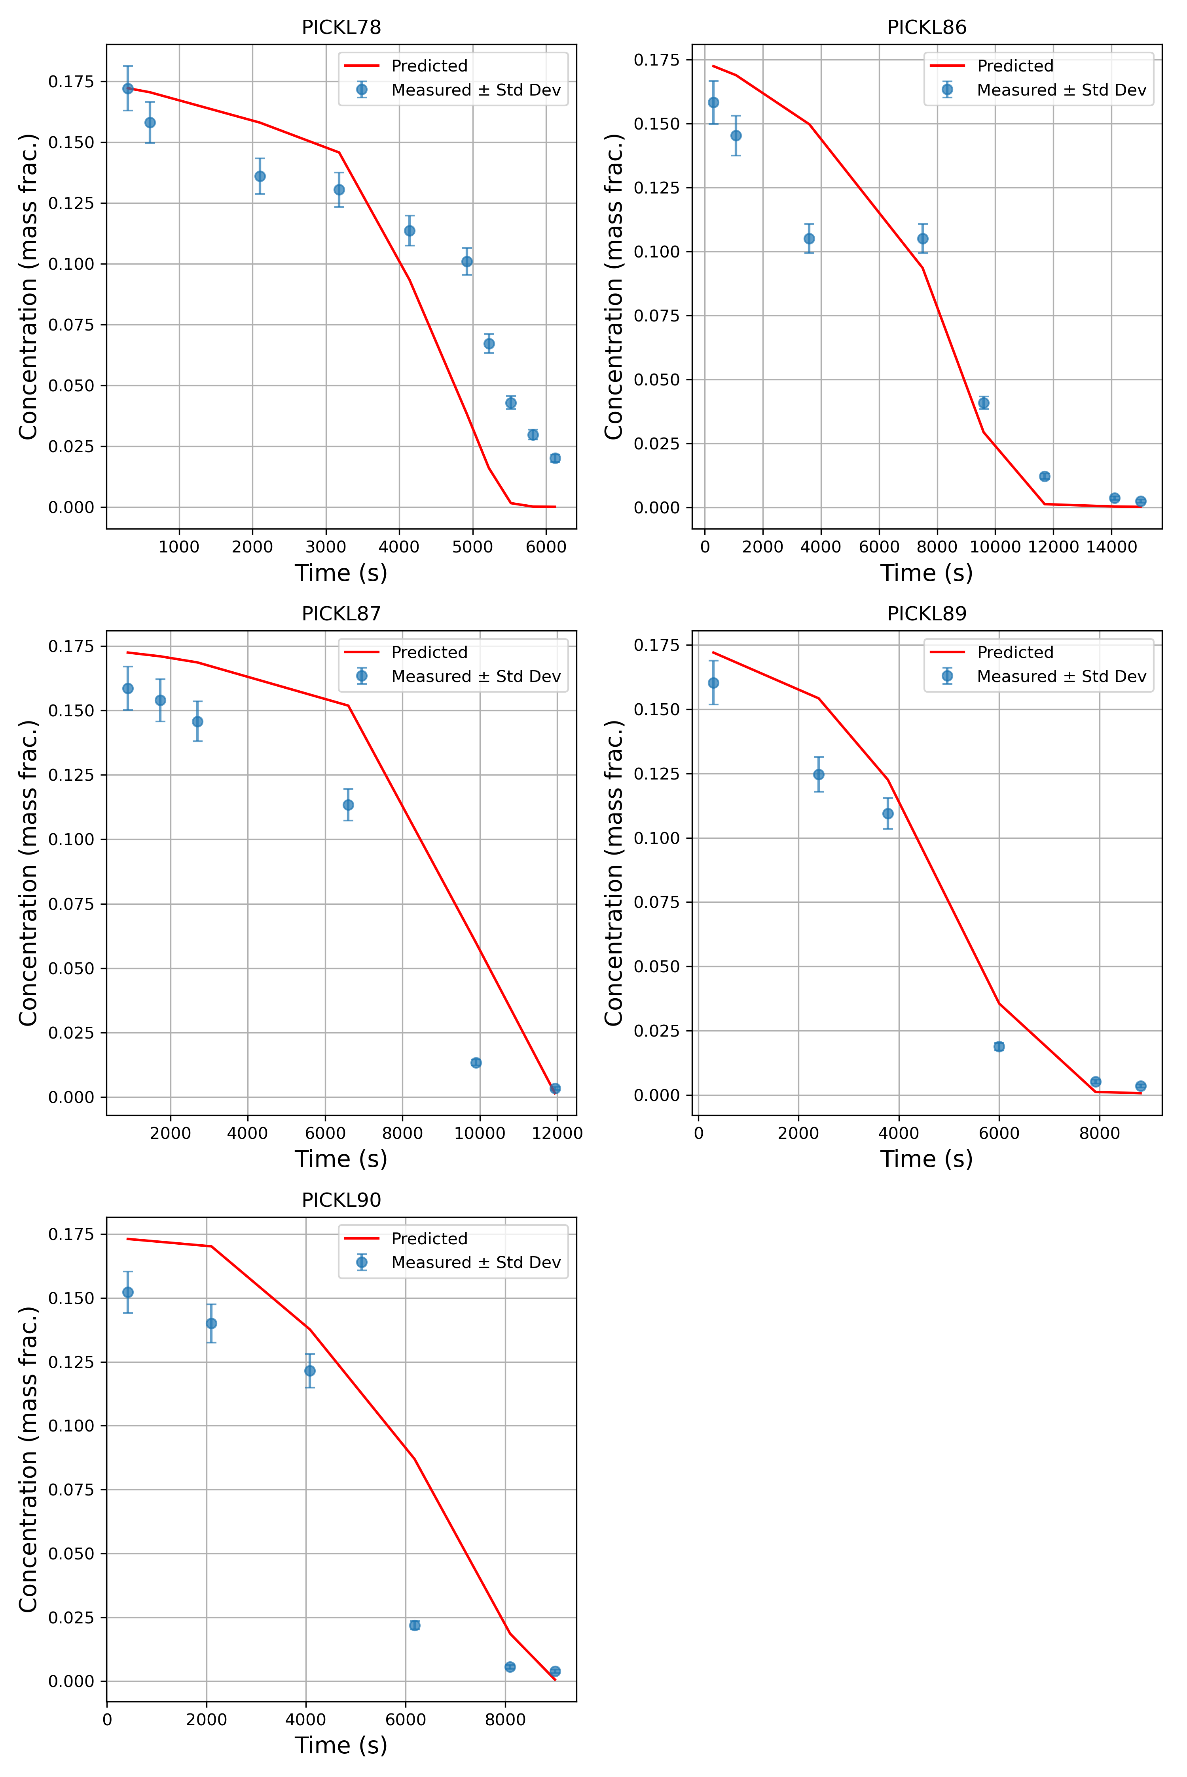


Figure 2. Measured and predicted concentration trends for low seed loading experiments assuming a growth only model.


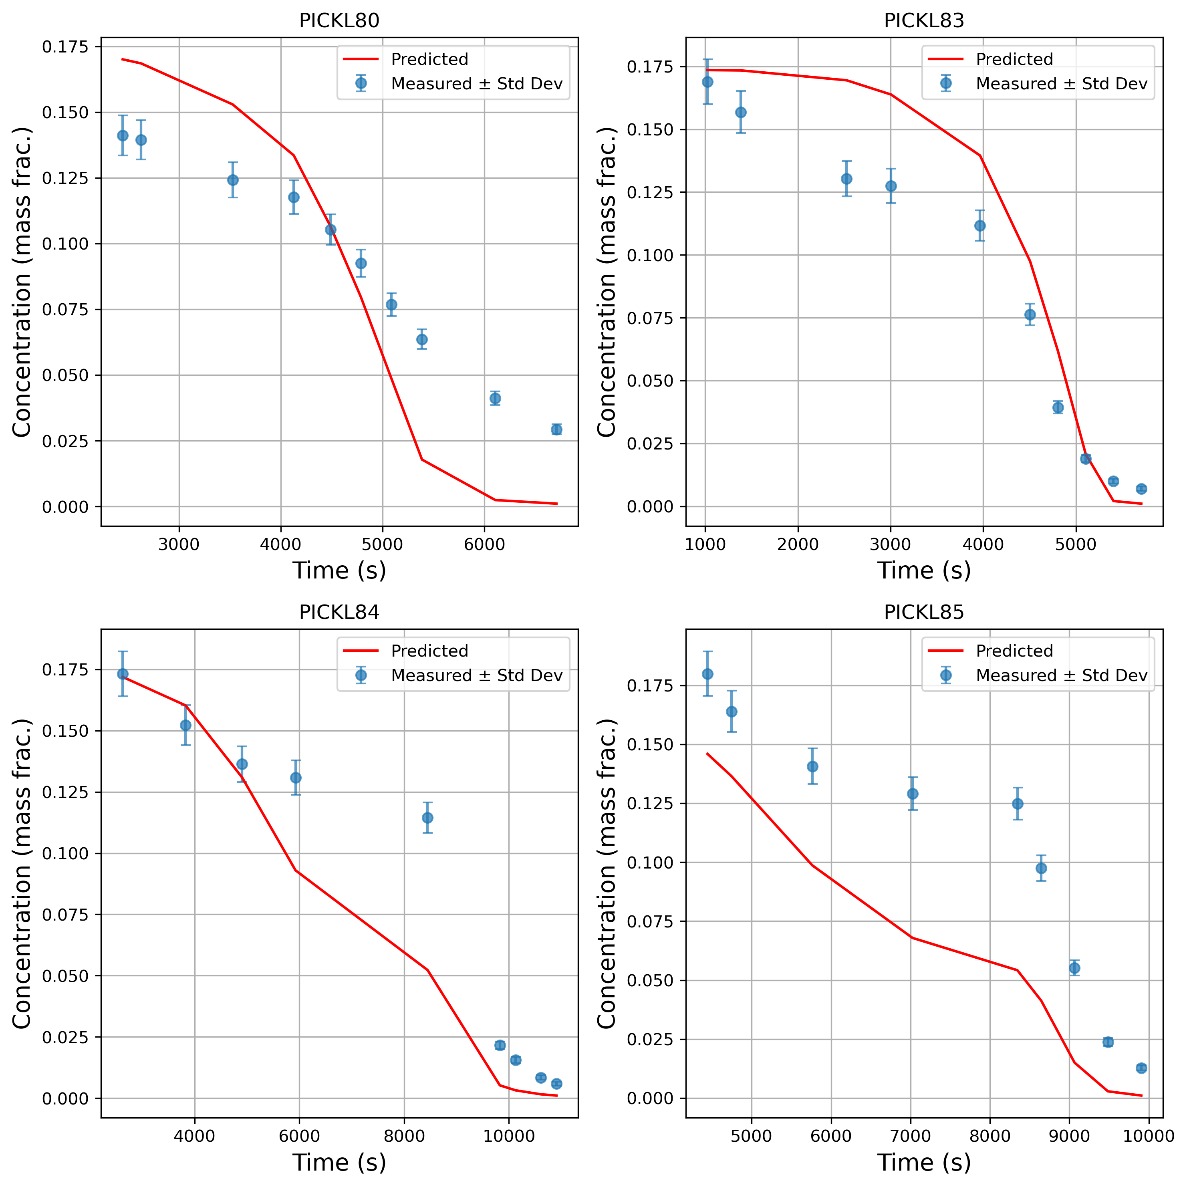


Figure 3. Measured and best fit predicted concentration trends for unseeded experiments to calibrate primary nucleation model parameters.

### 3.2. Benchmark Function – Random Forest

Nothing to add to ESI.

### 3.3. Experimental Design & Optimisation

Nothing to add to ESI.

## 4. Discussion

Nothing to add to ESI.
